# Supplementary material for: Interconvertible bistability in magnetic organic conductors based on bent donor molecules, EDO-EDSe-TTFVS(O)
Source: Royal Society of Chemistry journal article supplement (doi:10.1039/b904061g), 2009-01-01
Supplement: b904061g.pdf [file b904061g.pdf]

### Electronic Supporting Information

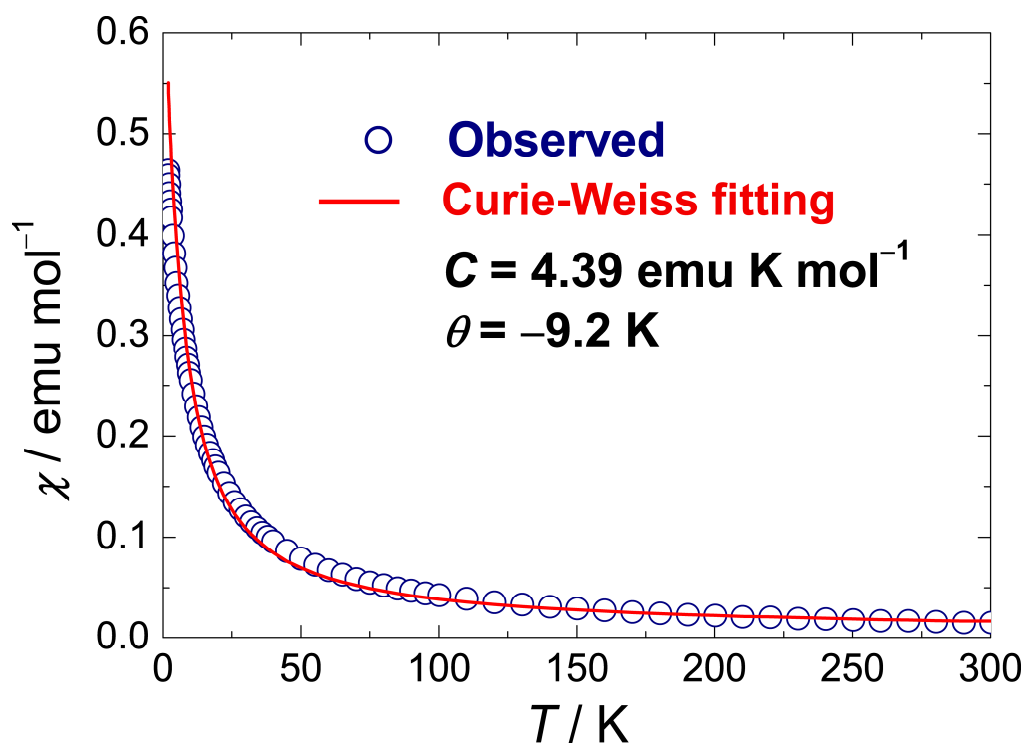

**Figure S1.** Temperature-dependent magnetic susceptibility ( $\chi$ ) of  $2_2\text{FeCl}_4(\text{DCE})$ .
